# Supplementary material for: NMR Profiling of Metabolites in Larval and Juvenile Blue Mussels (Mytilus edulis) under Ambient and Low Salinity Conditions
Source: PubMed Central journal article supplement (PMC5618318; doi:10.3390/metabo7030033), 2017-07-06
Supplement: metabolites-07-00033-s001.pdf [file metabolites-07-00033-s001.pdf]

# Supplementary Materials: NMR Profiling of Metabolites in Larval and Juvenile Blue Mussels (*Mytilus edulis*) under Ambient and Low Salinity Conditions

Melissa A. May, Karl D. Bishop and Paul D. Rawson

**Table S1.** Complete list of metabolites identified in *Mytilus edulis*

| No                                       | Chemical Shift (ppm) | Possible Identity |
|------------------------------------------|----------------------|-------------------|
| <b>Veliger-specific metabolites</b>      |                      |                   |
| 27                                       | 1.33, 1.57           |                   |
| 28                                       | 1.73, 4.18           |                   |
| 29                                       | 2.14, 2.23           |                   |
| 30                                       | 2.70, 3.58           | Sarcosine         |
| 31                                       | 2.74, 3.27, 3.44     |                   |
| 32                                       | 2.97, 4.30           |                   |
| 33                                       | 3.02, 4.19           |                   |
| 34                                       | 3.09, 3.57           |                   |
| 35                                       | 4.13, 4.18           |                   |
| 36                                       | 4.36, 5.97, 7.95     |                   |
| 37                                       | 4.39, 4.49, 6.13     |                   |
| 38                                       | 4.43, 6.68           |                   |
| <b>Pediveliger-specific metabolites</b>  |                      |                   |
| 39                                       | 1.4 (d)              |                   |
| 40                                       | 1.78, 3.12           |                   |
| 41                                       | 2.22, 2.24           |                   |
| 42                                       | 2.72, 3.46           |                   |
| 43                                       | 3.60, 5.39           |                   |
| 44                                       | 3.61, 3.84           |                   |
| 45                                       | 3.63, 3.96           |                   |
| 46                                       | 3.75, 4.65           |                   |
| 47                                       | 3.90, 4.10           |                   |
| 48                                       | 4.17, 4.28           |                   |
| 49                                       | 4.27, 4.58           |                   |
| 50                                       | 5.32, 7.03           |                   |
| 51                                       | 7.85 (m)             |                   |
| <b>Other larval-specific metabolites</b> |                      |                   |
| 52                                       | 3.37, 4.44           |                   |

|    |                        |         |
|----|------------------------|---------|
| 53 | 3.79, 3.90             |         |
| 54 | 1.86, 3.70             |         |
| 55 | 2.35 (m)               |         |
| 56 | 3.23, 4.65             |         |
| 57 | 3.38, 3.43             |         |
| 58 | 3.41, 3.69             |         |
| 59 | 3.42, 3.80             |         |
| 60 | 3.46, 3.71             |         |
| 61 | 3.46, 4.64             |         |
| 62 | 3.52, 3.70, 3.82, 5.22 | Glucose |
| 63 | 3.69, 3.72             |         |
| 64 | 4.48, 5.13             |         |
| 65 | 6.90                   |         |
| 66 | 7.19 (m)               |         |

---

**Mantle-specific metabolites**


---

|    |            |  |
|----|------------|--|
| 67 | 1.47, 1.90 |  |
| 68 | 3.07, 3.19 |  |
| 69 | 3.11, 3.41 |  |

*Table S1, continued*

---

| No | Chemical Shift (ppm) | Possible Identity |
|----|----------------------|-------------------|
|----|----------------------|-------------------|

---

**Mantle-specific metabolites, cont.**


---

|    |                      |                    |
|----|----------------------|--------------------|
| 70 | 3.17                 |                    |
| 71 | 3.34, 4.02           |                    |
| 72 | 3.48 (dd), 3.68 (dd) | Cysteine-S-sulfate |
| 73 | 3.90, 3.96           |                    |
| 74 | 5.23, 5.30           |                    |
| 75 | 7.31                 |                    |

---

**Adductor-specific metabolites**


---

|    |                        |                         |
|----|------------------------|-------------------------|
| 76 | 0.95 (m)               |                         |
| 77 | 1.08, 1.13             |                         |
| 78 | 1.19                   |                         |
| 79 | 1.49, 3.70             |                         |
| 80 | 2.46, 3.41             |                         |
| 81 | 2.68, 2.73             | Citric acid             |
| 82 | 2.76, 2.81             |                         |
| 83 | 2.86, 3.44, 3.59, 3.80 | Unknown #3 <sup>1</sup> |
| 84 | 3.13, 3.24             |                         |
| 85 | 3.18, 3.22             |                         |
| 86 | 3.23, 3.75             |                         |
| 87 | 3.9 (m)                |                         |

---

| No | Chemical Shift (ppm) | Possible Identity | Source of Metabolite <sup>2</sup> |
|----|----------------------|-------------------|-----------------------------------|
|----|----------------------|-------------------|-----------------------------------|

---

| <b>Juvenile-specific metabolites</b> |                        |                   |         |
|--------------------------------------|------------------------|-------------------|---------|
| 88                                   | 2.25, 3.88, 4.12, 4.64 |                   | M, A    |
| 89                                   | 6.59                   |                   | G, M    |
| 90                                   | 7.39 (m)               |                   | G, M    |
| <b>Other metabolites</b>             |                        |                   |         |
| 91                                   | 5.21 (d)               | $\alpha$ -glucose | P, A    |
| 92                                   | 5.38 (d)               | Allantoin         | P, A    |
| 93                                   | 6.54 (s)               |                   | P, A    |
| 94                                   | 3.08, 3.41             |                   | P, G    |
| 95                                   | 4.11, 4.38             |                   | P, G    |
| 96                                   | 4.49, 6.14             |                   | P, G    |
| 97                                   | 3.06 (m)               |                   | P, G, M |
| 98                                   | 8.29 (m)               |                   | P, G, A |
| 99                                   | 8.33 (m)               |                   | P, G, M |

<sup>1</sup>Metabolites listed by identity from [21]; <sup>2</sup>The source of metabolite is the tissue or stage that the metabolite was identified in, where A = adductor, M = mantle, G = gill, P = pediveliger, and V = veliger.
